# Supplementary material for: Biofilm Formation by Shiga Toxin-Producing Escherichia coli on Stainless Steel Coupons as Affected by Temperature and Incubation Time
Source: MDPI journal article supplement (doi:10.3390/microorganisms7040095), 2019-03-31
Supplement: s1 [file s1]

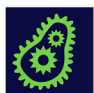

## Supplementary

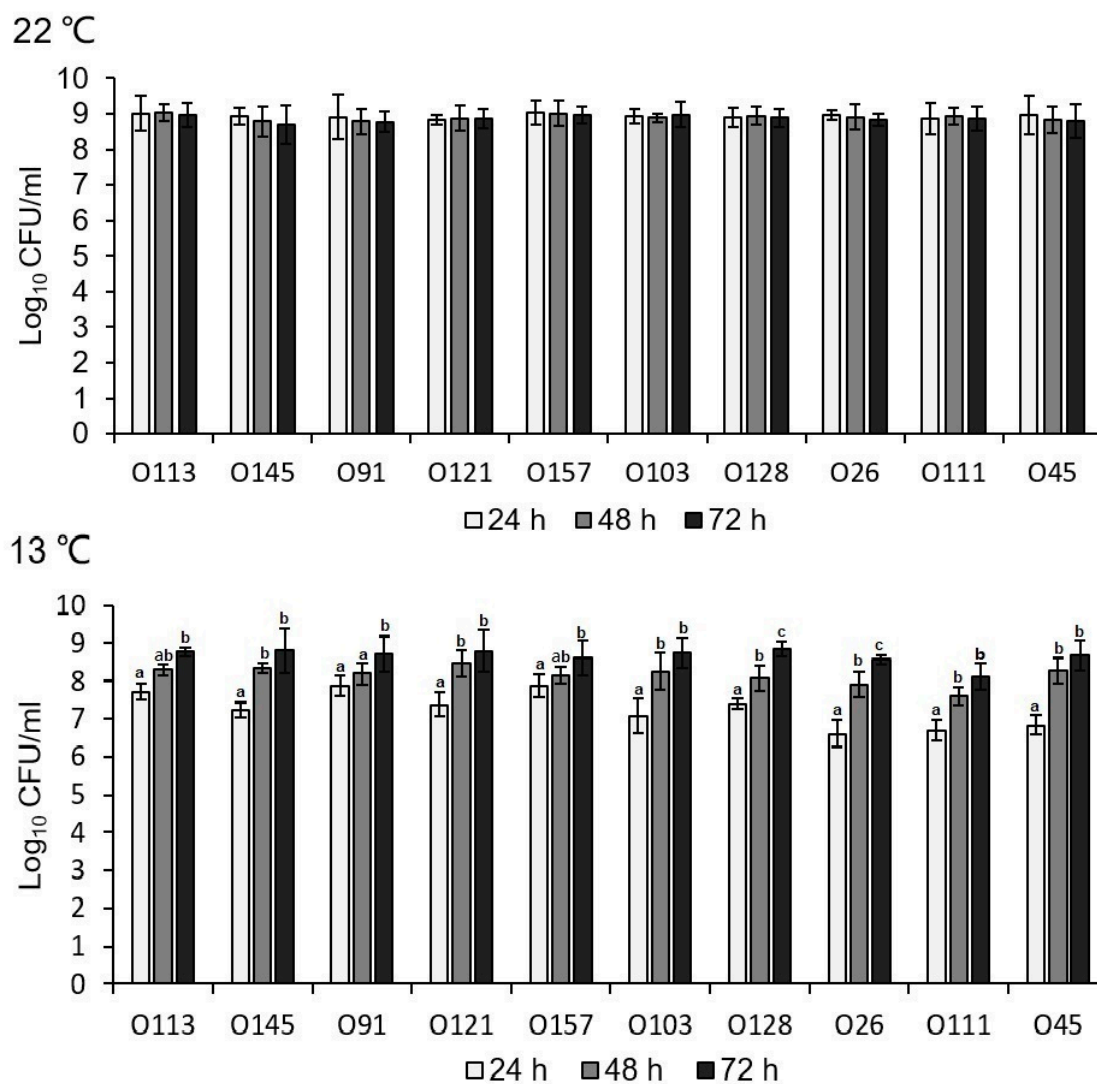

**Figure 1.** Growth of planktonic cells of the 10 STEC isolates after incubation at 22 °C (A) or 13 °C (B) for 24, 48 and 72 h. Means within a temperature and a strain with different superscripts differ ( $P < 0.05$ ).
